# Supplementary material for: Investigating the reactivities of a polyketide synthase module through fluorescent click chemistry
Source: Royal Society of Chemistry journal article supplement (doi:10.1039/c3cc47513a), 2013-10-29
Supplement: c3cc47513a.pdf [file c3cc47513a.pdf]

## Supporting Information

### Investigating the Reactivities of a Polyketide Synthase Module through Fluorescent Click Chemistry

Amanda J. Hughes, Matthew R. Tibby, Drew T. Wagner, Johnathan N. Brantley and Adrian T.  
Keatinge-Clay\*

Department of Chemistry and Biochemistry, The University of Texas at Austin, 1 University  
Station A5300, Austin, TX 78712, United States

*\*corresponding author:* [adriankc@utexas.edu](mailto:adriankc@utexas.edu)

## Table of Contents

| Page    | Section                                                  |
|---------|----------------------------------------------------------|
| S3-S7   | Experimental Procedures                                  |
| S8      | High-resolution Mass Spectrometry Results                |
| S9      | <sup>1</sup> H NMR of <b>5</b>                           |
| S10     | Phosphate Increases Substrate Turnover                   |
| S11     | TE-Mediated Glycerolysis Experimental Results            |
| S12     | <sup>1</sup> H NMR of <b>21</b>                          |
| S13-S18 | LC/MS Characterization of Sulforhodamine B Azide Adducts |
| S19-S34 | HPLC Peak Areas for <i>in vitro</i> EryMod6TE Reactions  |

## EXPERIMENTAL PROCEDURES

### Synthesis of methylmalonyl-*S-N*-acetylcysteamine thioester (mm-*S*-NAC, **1**)

*Mono-tert-butyl methylmalonic acid.* To methyl Meldrum's acid (8.5 g, 138 mmol) was added *tert*-butanol (40 mL) and pyridine (2 mL). The mixture was heated at 80 °C for 24 hrs. The reaction was then cooled to 23 °C and concentrated *in vacuo* to furnish mono-*tert*-butyl methylmalonic acid.

*Tert-butyl-methylmalonyl-S-N-acetylcysteamine.* To a stirred solution of 1-(3-dimethylaminopropyl)-3-ethylcarbodiimide hydrochloride (EDCI; 3.9 g, 21 mmol, 1.1 eq) in dichloromethane (DCM, 60 mL) at 23 °C was added triethylamine (TEA; 2.9 mL, 21 mmol, 1.1 eq). To the yellow solution was added the mono-*tert*-butyl methylmalonic acid (3.0 g, 19 mmol, 1.0 eq) followed by *N*-acetylcysteamine (NAC; 2.0 mL, 21 mmol, 1.1 eq). The resulting solution was stirred for 48 hrs, then diluted with ethyl acetate (50 mL) and washed with 0.1 M HCl (4 x 10 mL). The organic layer was dried over sodium sulfate and concentrated *in vacuo*.

*Methylmalonyl-S-N-acetylcysteamine.* To a stirred solution of *tert*-butyl-methylmalonyl-*S*-NAC (500 mg, 1.8 mmol, 1.0 eq) in DCM (9 mL) at 0 °C under argon was added 4.0 M HCl in dioxane (4.5 mL, 18 mmol, 10.0 eq). After 18 hrs, the reaction was concentrated *in vacuo* and purified by dry flash column chromatography (silica, eluting with 10:1 DCM:methanol) to afford compound **1**. <sup>1</sup>H NMR characterization was consistent with a previously reported synthesis (1).

*Methylmalonyl-S-N-acetylcysteamine thioester (mm-*S*-NAC, **1**)* <sup>1</sup>H NMR (400 MHz, CDCl<sub>3</sub>) δ 3.71 (q, 1H, *J* = 7.2), 3.48 (q, 2H, *J* = 6.0), 3.10 (dtd, 2H, *J* = 47.6, 14.2, 6.4), 1.98 (s, 3H), 1.45 (d, 3H, *J* = 7.2)

### Synthesis of methylmalonyl-ethanethiol thioester (mm-*S*-Et, **2**)

To a round-bottom flask charged with methylmalonic acid (10 g, 5 mmol, 1.0 eq), was added 4-dimethylaminopyridine (DMAP; 1 g, 8.5 mmol, 0.1 eq) followed by toluene (250 mL). Upon stirring, phosphoryl chloride (POCl<sub>3</sub>; 8.8 mL, 93 mmol, 1.1 eq) was added followed by the dropwise addition of ethanethiol (6.9 mL, 93 mmol, 1.1 eq). The reaction was heated to 60 °C under an argon atmosphere. After 18 hrs, the reaction was cooled to 23 °C and concentrated *in vacuo*. The residue was suspended in DCM, and purified via dry flash column chromatography (silica, eluting with an ethyl acetate:hexanes gradient from 1:9 to 1:3) to furnish compound **2**.

*Methylmalonyl ethanethiol thioester (**2**)* <sup>1</sup>H NMR (400 MHz, CDCl<sub>3</sub>) δ 3.67 (q, 1H, *J* = 7.1), 2.94 (q, 2H, *J* = 7.4), 1.47 (d, 3H, *J* = 7.2), 1.28 (t, 3H, *J* = 7.4)

### Synthesis of **3**, **6-10**

To a round-bottom flask charged with 75 mL of anhydrous DCM cooled to 0 °C under an atmosphere of argon was dissolved EDCI (1.054 g, 5.5 mmol, 1.1 eq), TEA (773 μL, 5.5 mmol, 1.1 eq), 4-pentynoic acid (**6** and **8**, 490 μL, 5.0 mmol, 1.0 eq) or 5-hexynoic acid (**3** and **9**, 562 μL, 5.0 mmol, 1.0 eq) or 6-heptynoic acid (**7** and **10**, 633 μL, 5.0 mmol, 1.0 eq), and catalytic DMAP (307 mg, 2.5 mmol, 0.5 eq). The reaction was stirred on ice for 10 min before the addition of NAC (**3**, **6-7**, 504 μL, 4.75 mmol, 0.95 eq) or ethanethiol (**8-10**, 342.3 μL, 4.75 mmol, 0.95 eq) and was allowed to warm to room temperature. After 16 hrs, the reaction was concentrated *in vacuo* and the remaining oil was resuspended in 50 mL of water. The product was extracted with ethyl acetate (1 x 150 mL) and the organic layer was washed with 0.1 M HCl (2 x 50 mL) and saturated sodium bicarbonate (1 x 50 mL). The organic layer was dried over anhydrous sodium sulfate, and product was concentrated *in vacuo*. Products were purified by dry flash column chromatography (silica, eluting with 10:90 ethyl acetate:hexanes) to afford title compounds **3**, **6-10**. Products were characterized by <sup>1</sup>H NMR.

*5-Hexynoyl-S-N-acetylcysteamine (**3**)* <sup>1</sup>H NMR (400 MHz, CDCl<sub>3</sub>) δ 5.80 (bs, 1H), 3.44 (q, 2H, *J* = 6.0), 3.04 (t, 2H, *J* = 6.6), 2.74 (t, 2H, *J* = 7.6), 2.26 (dt, 2H, *J* = 6.9, 2.6), 1.99 (t, 1H, *J* = 2.6), 1.97 (s, 3H), 1.89 (m, 2H, *J* = 7.7)

4-Pentynoyl-*S-N*-acetylcysteamine (**6**)  $^1\text{H}$  NMR (400 MHz,  $\text{CDCl}_3$ )  $\delta$  5.78 (bs, 1H), 3.44 (q, 2H,  $J = 6.0$ ), 3.06 (t, 2H,  $J = 6.6$ ), 2.81 (t, 2H,  $J = 7.3$ ), 2.54 (dt, 2H,  $J = 7.2$  and 2.6), 1.99 (t, 1H,  $J = 2.6$ ), 1.96 (s, 3H)

6-Heptynoyl-*S-N*-acetylcysteamine (**7**)  $^1\text{H}$  NMR (400 MHz,  $\text{CDCl}_3$ )  $\delta$  5.80 (bs, 1H), 3.43 (q, 2H,  $J = 6.1$ ), 3.03 (t, 2H,  $J = 6.6$ ), 2.61 (t, 2H,  $J = 7.3$ ), 2.21 (dt, 2H,  $J = 7.1$ , 2.7), 1.97 (s, 3H), 1.96 (t, 1H,  $J = 2.7$ ), 1.79 (m, 2H,  $J = 7.6$ ), 1.60-1.53 (m, 2H,  $J = 7.1$ )

4-Pentynoyl-*S*-ethanethiol (**8**)  $^1\text{H}$  NMR (400 MHz,  $\text{CDCl}_3$ )  $\delta$  2.90 (q, 2H,  $J = 7.4$ ), 2.77 (t, 2H,  $J = 7.2$ ), 2.53 (dt, 2H,  $J = 6.8$  and 2.6), 1.98 (t, 1H,  $J = 2.6$ ), 1.25 (t, 3H,  $J = 7.4$ )

5-Hexynoyl-*S*-ethanethiol (**9**)  $^1\text{H}$  NMR (400 MHz,  $\text{CDCl}_3$ )  $\delta$  2.88 (q, 2H,  $J = 7.4$ ), 2.68 (t, 2H,  $J = 7.2$ ), 2.25 (dt, 2H,  $J = 6.9$  and 2.8), 1.98 (t, 1H,  $J = 2.7$ ), 1.88 (m, 2H,  $J = 7.8$ ), 1.25 (t, 3H,  $J = 7.4$ )

6-Heptynoyl-*S*-ethanethiol (**10**)  $^1\text{H}$  NMR (400 MHz,  $\text{CDCl}_3$ )  $\delta$  2.87 (q, 2H,  $J = 7.4$ ), 2.57 (t, 2H,  $J = 7.3$ ), 2.21 (dt, 2H,  $J = 7.0$ , 2.6), 1.95 (t, 1H,  $J = 2.6$ ), 1.79 (m, 2H,  $J = 7.8$ ), 1.60-1.53 (m, 2H,  $J = 7.5$ ), 1.25 (t, 3H,  $J = 7.4$ )

### Synthesis of **15**

To a round-bottom flask charged with a stir bar and **2** (50  $\mu\text{L}$ , 0.37 mmol, 2.0 eq) under an atmosphere of argon was added anhydrous tetrahydrofuran (THF; 1 mL) and magnesium ethoxide (21.4 mg, 0.19 mmol, 1.0 eq). To a separate round-bottom flask charged with a stir bar and 5-hexynoic acid (63  $\mu\text{L}$ , 0.56 mmol, 3.0 eq) under an atmosphere of argon was added anhydrous THF (3 mL) and carbonyldiimidazole (CDI; 90.8 mg, 0.56 mmol, 3.0 eq). Reactions were stirred at room temperature. After 1 hr, the reaction generating the magnesium salt of methylmalonyl ethanethioester was concentrated *in vacuo*. To the residue, the solution of the acyl imidazole was added, and the reaction was stirred under argon for an additional 16 hrs. The reaction was concentrated *in vacuo* and resuspended in 0.1 M HCl (10 mL) and ethyl acetate (50 mL). The organic layer was washed with 0.1 M HCl (1 x 30 mL) and then with saturated sodium chloride (1 x 10 mL). The organic layer was dried over anhydrous sodium sulfate, and product was isolated *in vacuo*. The product was purified by dry flash column chromatography (silica, eluting with 5:95 ethyl acetate:hexanes) to afford compound **15**.

(2*RS*)-Methyl-3-oxo-hept-6-ynoyl-*S*-ethanethiol (**15**)  $^1\text{H}$  NMR (400 MHz,  $\text{CDCl}_3$ )  $\delta$  3.74 (q, 2H,  $J = 7.1$ ), 2.92 (q, 2H,  $J = 7.4$ ), 2.79 (m, 2H,  $J = 27.6$ ), 2.22 (m, 2H), 1.94 (t, 1H,  $J = 2.6$ ), 1.38 (d, 3H,  $J = 7.1$ ), 1.26 (t, 3H,  $J = 7.4$ )

### Synthesis of sulforhodamine B azide

Synthesis of 2-azidoethanol followed previously described method (2). A 25 mL Schlenk flask was charged with 2-azidoethanol (17 mg, 0.19 mmol, 1.1 eq), TEA (2.6  $\mu\text{L}$ , 0.19 mmol, 1.1 eq) and DCM (5 mL). The resulting solution was cooled to 0  $^\circ\text{C}$  and allowed to stir for 10 min. A sulforhodamine B acid chloride solution in 5 mL DCM (100 mg, 0.17 mmol, 1.0 eq) was subsequently added dropwise via syringe. The resulting solution was stirred at 0  $^\circ\text{C}$  for 30 min and then allowed to stir at room temperature. Upon reacting for 12 hrs, the product was isolated *in vacuo* to afford a metallic green residue. The product was first to elute upon purification by dry flash column chromatography (silica, eluting with 90:10 chloroform:methanol).

### Engineering EryMod6TE mutant plasmids

The formation of EryMod6TE plasmid was described previously (3). Site-directed mutagenesis of EryMod6TE plasmid was performed to engineer mutant plasmids using single-step mutagenesis protocol outlined by Liu and coworkers with the following primers (italics depicts overlapping region and alanine residue is underlined) (4):  $\Delta\text{KS}$  forward 5'-ACCTGT GCCGTCGGAGAAGGTCGGACCACCGGAATGTGAGGCGAAACCG-3';  $\Delta\text{KS}$  reverse 5'-GGC TTAGAAGGTCCGGCGGTAACCGTGGACACGGCAGCCTCTTCCAGCC-3';  $\Delta\text{AT}$  forward 5'-CGGCAATAGCCAGTACGAGTCCCGCTTTAACGCCCGCCGGCAGCAC-3';  $\Delta\text{AT}$  reverse 5'-CGT GTGGGGTGAGCCCGTCAGCCGTTATCGGTCATGCTCAGGGC-3';  $\Delta\text{TE}$  forward 5'-CAG

*GCCACGCCCGCGGCGCACTCATGGCCTATGCACTCGCGAC-3'*;  $\Delta$ TE reverse *5'-CGTG  
GGAACCACCTGTTTGGAAAGCACCATCGTCCGGTGCGGCGGCCGC-3'*.

PCR reaction conditions to engineer  $\Delta$ KS,  $\Delta$ AT and  $\Delta$ TE plasmids was performed using the following conditions (50 mL total volume reactions): 1X Phusion GC buffer, 5 ng EryMod6TE plasmid, 1 mM each corresponding forward and reverse primers, 200 mM dNTPs, 3% v/v DMSO and 3 U Phusion DNA polymerase.

PCR reaction conditions to engineer  $\Delta$ KS+AT plasmid was performed using the following conditions (50 mL total volume reactions): 1X Phusion GC buffer, 5 ng  $\Delta$ AT plasmid, 1 mM each  $\Delta$ KS forward and reverse primers, 200 mM dNTPs, 3% v/v DMSO and 3 U Phusion DNA polymerase.

PCR reaction conditions to engineer  $\Delta$ KS+TE plasmid was performed using the following conditions (50 mL total volume reactions): 1X Phusion GC buffer, 5 ng  $\Delta$ TE plasmid, 1  $\mu$ M each  $\Delta$ KS forward and reverse primers, 200 mM dNTPs, 3% v/v DMSO and 3 U Phusion DNA polymerase.

PCR reaction conditions to engineer  $\Delta$ AT+TE plasmid was performed using the following conditions (50 mL total volume reactions): 1X Phusion GC buffer, 5 ng  $\Delta$ TE plasmid, 1 mM each  $\Delta$ AT forward and reverse primers, 200 mM dNTPs, 3% v/v DMSO and 3 U Phusion DNA polymerase.

### Protein expression, dialysis, and purification

EryMod6TE expression plasmids were transformed into *E. coli* K207-3 cells (5), while the glucose dehydrogenase (GDH) and the EryTE expression plasmids were each transformed into *E. coli* BL21(DE3) cells (6). Starter cultures (60 mL) were grown overnight and used to inoculate Luria broth supplemented with 50 mg/L kanamycin (6 L, 37 °C). Cultures were cooled to 15 °C after cells reached OD<sub>600</sub> = 0.4, and protein expression was induced (0.5 mM IPTG). After 16 hrs, cells were harvested by centrifugation (4,500 x g, 10 min) and resuspended in 40 mL lysis buffer (0.5 M NaCl, 30 mM HEPES pH 7.5). Cells were lysed via sonication, and cellular debris was removed (centrifugation at 30,000 x g, 60 min). EryMod6TE and GDH lysates were dialyzed against 1 L lysis buffer at 4 °C. After 4 hrs, the buffer was exchanged with 1 L fresh lysis buffer, and allowed to dialyze for an additional 16 hrs. Lysates were centrifuged (4,000 x g, 10 min), flash-frozen, and stored at -80 °C until further use. EryTE was further purified for TE-mediated hydrolysis experiments by passing the cell lysate over a nickel-NTA column equilibrated with lysis buffer. The column was washed with lysis buffer containing 15 mM imidazole (25 mL) and protein was eluted with lysis buffer containing 150 mM imidazole (5 mL).

### Conditions for EryMod6TE reactions

The following stock solutions were prepared: 1.5 M Tris-HCl pH 7.5, 5 M NaCl, 3 M glucose, 100 mM NADP<sup>+</sup>, 0.5 M **1** and **2** in DMSO, and 0.1 M **3**, **6-10** in DMSO.

Tris-HCl pH 7.5 (150 mM), NaCl (100 mM), glucose (500 mM), NADP<sup>+</sup> (10 mM), extender unit **1** or **2** (5 mM), priming unit **3** or **6-10** (2.5 mM), pure DMSO (5% v/v), water, dialyzed GDH lysate (10% v/v), and dialyzed EryMod6TE lysate (25% v/v) were combined in a microcentrifuge tube (200 mL reaction volume). After addition of each dialyzed enzyme lysate, reactions were gently mixed by pipetting and then centrifuged (3000 x g, 5 sec). Reactions were incubated at 23 °C for 16 hrs before being subjected to CuAAC with sulforhodamine B azide. Negative control reactions contained all substrates except for EryMod6TE dialyzed lysate. Reactions were performed in duplicate.

### Preparative *in vitro* synthesis of reduced diketide **5**

Tris-HCl pH 7.5 (150 mM), NaCl (100 mM), glucose (500 mM), NADP<sup>+</sup> (10 mM), extender unit **2** (5 mM), priming unit **3** (2.5 mM), pure DMSO (total 5% v/v), water, dialyzed GDH lysate (10% v/v), and dialyzed EryMod6TE lysate (25% v/v) were combined in a conical tube in a total volume of 25 mL. After the addition of each dialyzed lysate, reactions were gently mixed by pipetting and then centrifuged (3000 x g, 5 sec). After 16 hrs, the reaction was washed using diethyl ether (1 x 50 mL). The aqueous layer was then acidified using 12 N HCl (2 mL) and products were extracted with ethyl acetate (3 x 150 mL). The organic layer was dried over sodium sulfate and concentrated *in vacuo*. Diketide **5** was purified by dry

flash column chromatography (silica, eluting with 10:89:1 ethyl acetate:hexanes:acetic acid) and characterized by  $^1\text{H}$  NMR.

#### **Phosphate-containing reaction conditions**

Tris-HCl pH 7.5 (150 mM), NaCl (100 mM), extender unit **2** (5 mM), priming unit **3** (2.5 mM), pure DMSO (total 5% v/v),  $\text{Na}_2\text{HPO}_4$  pH 7 (0, 10, 50 or 100 mM), water, dialyzed GDH lysate (10% v/v) and dialyzed EryMod6TE lysate (25% v/v) were combined in a microcentrifuge tube (200  $\mu\text{L}$  total volume). After addition of each dialyzed lysate, reactions were gently mixed by pipetting and then centrifuged (3000  $\times$  g, 5 sec). Reactions were incubated at 23  $^\circ\text{C}$  for 16 hrs before being subjected to CuAAC with sulforhodamine B azide. Negative control reactions contained all substrates except for EryMod6TE dialyzed lysate. Reactions were performed in duplicate.

#### **Glycerol-containing reaction condition**

Reactions were prepared as described in “Conditions for EryMod6TE reactions” except for the use of 10% v/v glycerol and EryMod6TE knockouts (25% v/v;  $\Delta\text{KS}$ ,  $\Delta\text{AT}$ ,  $\Delta\text{TE}$ ,  $\Delta\text{KS}+\text{AT}$ ,  $\Delta\text{KS}+\text{TE}$ , and  $\Delta\text{AT}+\text{TE}$ ). In the experiment with purified EryTE, Tris-HCl pH 7.5 (150 mM), NaCl (100 mM), priming unit **3** (2.5 mM), glycerol (10% v/v), water, and nickel-purified EryTE (25% v/v) were added to a microcentrifuge tube (200  $\mu\text{L}$  total volume). Reactions were incubated at 23  $^\circ\text{C}$  for 16 hrs before being subjected to CuAAC with sulforhodamine B azide.

#### **CuAAC reaction conditions**

The following stock solutions were prepared: 10 mM sulforhodamine B azide in DMSO, 1 M sodium ascorbate, and 0.5 M copper(II) sulfate.

DMSO (50% v/v), sulforhodamine B azide (1 mM), EryMod6TE reaction (0.75 mM), and sodium ascorbate (40 mM) were combined (48  $\mu\text{L}$  total volume) in a microcentrifuge tube. Reactions were vortexed and centrifuged (3000  $\times$  g, 5 sec). Copper(II) sulfate (20 mM) was then added and immediately vortexed for 3 seconds to initiate the click reaction. Samples were incubated at 23 $^\circ\text{C}$  for 1 hr and stored at -80  $^\circ\text{C}$  until further use.

#### **HPLC and fluorescence detection**

Reactions subjected to CuAAC were centrifuged to remove debris (20,000  $\times$  g, 2 min). Samples (20  $\mu\text{L}$ ) were analyzed using a Waters Symmetry $^\circledR$  C18 3.5  $\mu\text{m}$  4.6  $\times$  75 mm column on a Beckman Coulter System Gold $^\circledR$  126 Solvent Module equipped with a Jasco FP-2020 Plus Intelligent Fluorescence Detector ( $\lambda_{\text{ex}} = 565$  nm,  $\lambda_{\text{em}} = 586$  nm). The mobile phases consisted of degassed, deionized water + 0.1% TFA (solvent A) and degassed acetonitrile + 0.1% TFA (solvent B). A linear gradient (flow rate = 1 mL/min) of 75% to 55% B over 40 min followed by 10 min at 100% B was used to analyze reactions. Data was analyzed using 32 Karat Software.

#### **LC/MS analysis**

Whole reactions or compounds collected from HPLC runs were subjected to positive-ESI LC/MS (Agilent Technologies 1200 Series HPLC with a Gemini C18 column coupled to an Agilent Technologies 6130 quadrupole mass spectrometer). Mobile phases consisted of water containing 0.1% formic acid (solvent A) and acetonitrile containing 0.1% formic acid (solvent B). A linear gradient (flow rate = 0.7 mL/min) of 5%–95% B over 12 min was used.

#### **High-Resolution Mass Spectrometry**

All samples were subject to positive electrospray ionization and masses were characterized on an Agilent 630 Accurate Mass Q-ToF LC/MS.

## References:

1. Pohl, N. L., Gokhale, R. S., Cane, D. E., and Khosla, C. (1998) Synthesis and incorporation of an *N*-acetylcysteamine analogue of methylmalonyl-CoA by a modular polyketide synthase. *J. Am. Chem. Soc.* **120**, 11206-11207.
2. Lu, X. and Bittman, R. (2005) Synthesis of a photoactivatable (2*S*,3*R*)-sphingosylphosphorylcholine analogue. *J. Org. Chem.* **70**, 4746-4750.
3. Hughes, A. J. and Keatinge-Clay, A. T. (2011) Enzymatic extender unit generation for *in vitro* polyketide synthase reactions: structural and functional showcasing of *Streptomyces coelicolor* MatB. *Chem. Biol.* **18**, 165-176.
4. Liu, H. and Naismith, J. (2008) An efficient one-step site-directed deletion, insertion, single and multiple-site plasmid mutagenesis protocol. *BMC Biotech.* **8**, 91-100.
5. Murli, S., Kennedy, J. Dayem, L. C., Carney, J. R., and Kealey, J. T. (2003) Metabolic engineering of *Escherichia coli* for improved 6-deoxyerythronolide B production. *J. Ind. Microbiol. Biotech.* **30**, 500-509.
6. Piasecki, S. K. and Keatinge-Clay, A. T. (2012) Monitoring biocatalytic transformations mediated by polyketide synthase enzymes in cell lysate via fluorine NMR. *SynLett* **23**, 1840-1842.

## High-Resolution Mass Spec Analysis – Positive ESI

**Table S1.** High Resolution Mass Spec Analysis of Compounds

| Compound                                                                            | Formula                                                  | High Resolution Mass: (exp) obs |
|-------------------------------------------------------------------------------------|----------------------------------------------------------|---------------------------------|
|    | $C_{29}H_{34}N_5O_7S_2$                                  | (628.1899) 628.1897             |
|    | <b>3*</b> $C_{39}H_{48}N_6NaO_9S_3$                      | (863.2543) 863.2526             |
|                                                                                     | <b>6*</b> $C_{38}H_{46}N_6NaO_9S_3$                      | (849.2386) 849.2374             |
|                                                                                     | <b>7*</b> $C_{40}H_{50}N_6NaO_9S_3$                      | (877.2699) 877.2681             |
|    | <b>8*</b> $C_{36}H_{43}N_5NaO_8S_3$                      | (792.2172) 792.2195             |
|                                                                                     | <b>9*</b> $C_{37}H_{45}N_5NaO_8S_3$                      | (806.2328) 206.2328             |
|                                                                                     | <b>10*</b> $C_{38}H_{47}N_5NaO_8S_3$                     | (820.2485) 820.2451             |
|    | <b>4*</b> $C_{35}H_{42}N_5O_9S_2$                        | (740.2424) 740.2427             |
|                                                                                     | <b>11*</b> $C_{34}H_{39}N_5NaO_9S_2$                     | (748.2087) 748.2082             |
|                                                                                     | <b>12*</b> $C_{36}H_{43}N_5NaO_9S_2$                     | (776.2400) 776.2379             |
|    | <b>5*</b> $C_{38}H_{47}N_5NaO_{10}S_2$                   | (820.2662) 820.2635             |
|                                                                                     | <b>13*</b> $C_{37}H_{45}N_5NaO_{10}S_2$                  | (806.2506) 806.2499             |
|                                                                                     | <b>14*</b> $C_{39}H_{50}N_5O_{10}S_2$                    | (812.2999) 812.2984             |
|    | <b>16*</b> $C_{38}H_{45}N_5NaO_{10}S_2$                  | (818.2506) 818.2482             |
|  | <b>17*</b> $C_{40}H_{51}N_5NaO_9S_3$                     | (864.2747) 864.2734             |
|  | <b>18a*</b> ( <i>syn</i> ) $C_{38}H_{47}N_5NaO_{10}S_2$  | (820.2662) 820.2635             |
|                                                                                     | <b>18b*</b> ( <i>anti</i> ) $C_{38}H_{47}N_5NaO_{10}S_2$ | (820.2662) 820.2639             |
|  | <b>19*</b> $C_{41}H_{49}N_5NaO_{10}S_2$                  | (858.2819) 858.2790             |
|                                                                                     | <b>20*</b> $C_{41}H_{51}N_5NaO_{10}S_2$                  | (860.2975) 860.2968             |



### $^1\text{H}$ NMR of **5**

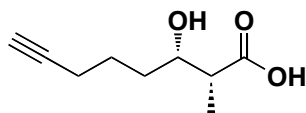

SpinWorks 3:

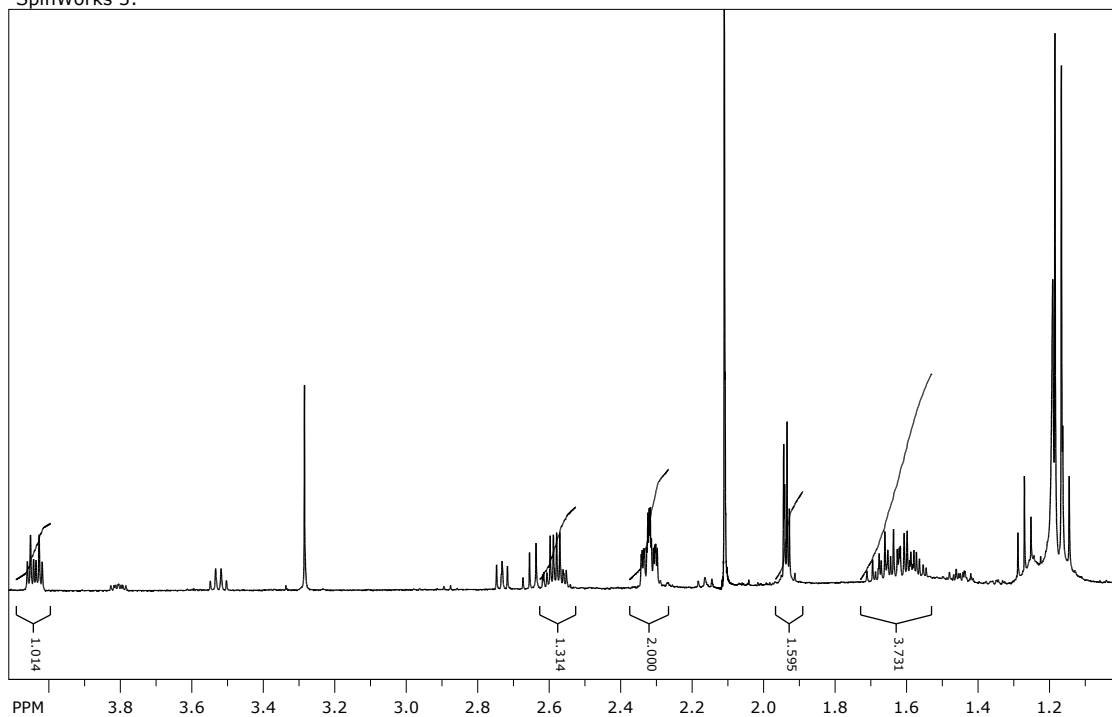

file: ...\\ajh0419\_64frac5t\_s2pul\_H1.fid\fid\_block# 1 expt: "s2pul"  
transmitter freq.: 399.807110 MHz  
time domain size: 51282 points  
width: 6410.26 Hz = 16.0334 ppm = 0.125000 Hz/pt  
number of scans: 64

freq. of 0 ppm: 399.804738 MHz  
processed size: 65536 complex points  
LB: 0.100 GF: 0.0000  
Hz/cm: 49.904 ppm/cm: 0.12482

## Phosphate increases substrate turnover

Increased turnover numbers for triketide lactone formation by the bimodular DEBS1+TE (the first polypeptide of the erythromycin PKS fused to EryTE) were observed with increases in phosphate concentration (Pieper 1996). To determine whether phosphate has a similar effect on single-module constructs, EryMod6TE was incubated with 0–100 mM phosphate, priming unit **3**, extender unit **2**, and the NADPH regeneration system (Figure S1A). After 2 and 16 hrs, reactions were subjected to CuAAC with sulforhodamine B azide and analyzed by HPLC (Figure S1B-C).

After 2 hrs, 20% of **3** was converted to **5** in the absence of phosphate, while 31% had been converted in the presence of 100 mM phosphate (Figure S1B). After 2 hrs, 43% of **3** remained unreacted in the absence of phosphate, whereas only 20% remained unreacted in the presence of 100 mM phosphate. After 16 hrs, no **3** remained and no precipitate was observed in reactions containing at least 50 mM phosphate (Figure S1).

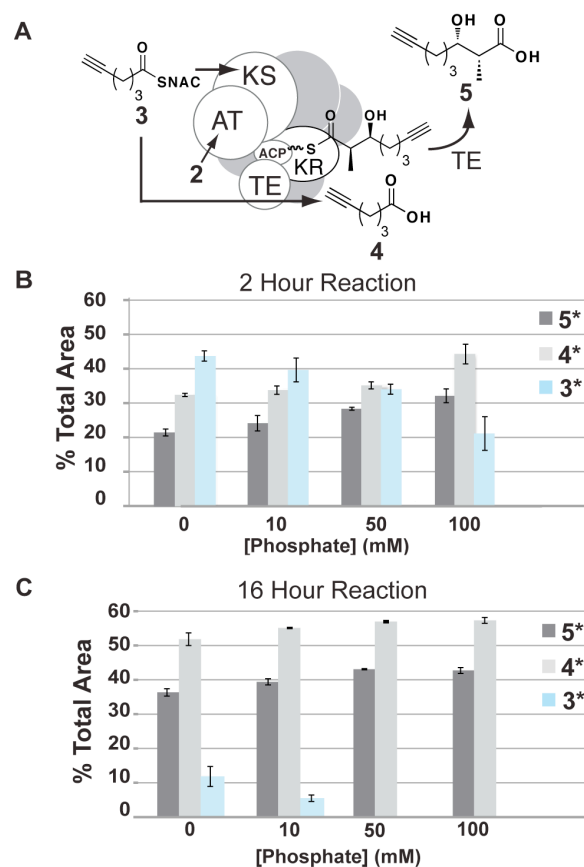

**Figure S1.** Phosphate enhances turnover. **A**) EryMod6TE operating as a reduced diketide synthase. **B**) Comparison of peak areas for 2 hr reactions shows increased substrate turnover with phosphate concentration. **C**) Comparison of peak areas for 16 hr reactions shows complete substrate turnover when the phosphate concentration is at least 50 mM.

Pieper, R., Ebert-Khosla, S., Cane, D. E., and Khosla, C. (1996) Erythromycin biosynthesis: kinetic studies on a fully active modular polyketide synthase using natural and unnatural substrates. *Biochemistry* **35**, 2054-2060.

### TE-catalyzed glycerolysis

Previously, glycerol has been used to prevent precipitation of EryMod6TE in dialyzed lysate (Hughes 2012 and Harper 2012); however, HPLC analysis of EryMod6TE-catalyzed reactions in the presence of glycerol yielded a large, unanticipated peak (**21\***, Figure S2B). <sup>1</sup>H NMR analysis confirmed that this peak resulted from priming unit glycerolysis. A panel of single and double knockout mutants of EryMod6TE was assayed for the ability to generate **21** ( $\Delta$ KS,  $\Delta$ AT,  $\Delta$ TE,  $\Delta$ KS+AT,  $\Delta$ KS+TE, and  $\Delta$ AT+TE; catalytic nucleophiles replaced by alanines). Through these experiments, TE activity was linked to the generation of **21** (Figure S2C). TE-catalyzed glycerolysis was confirmed when **21\*** was observed from the incubation of purified EryTE with **3** in a glycerol-containing buffer (Figure S2D). <sup>1</sup>H NMR characterization of **21** yielded the following spectra: (400 MHz, CDCl<sub>3</sub>)  $\delta$  4.18-4.07 (m, 2H), 3.91-3.86 (m, 1H), 3.67-3.52 (m, 2H), 2.45 (t, 2H,  $J = 7.4$ ), 2.22 (m, 2H), 1.92 (t, 1H,  $J = 2.7$ ), 1.80 (m, 2H,  $J = 7.3$ ).

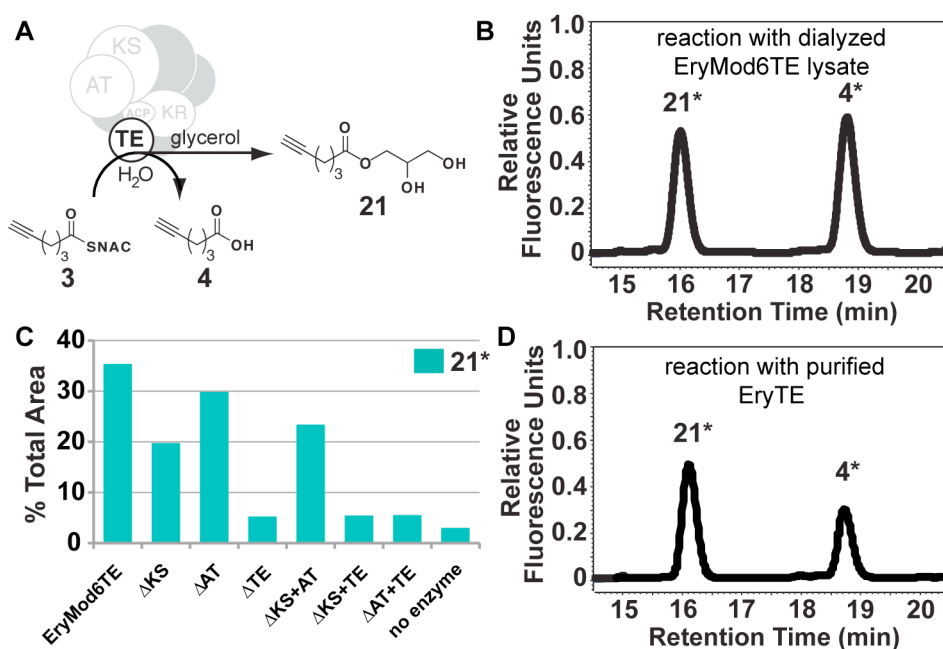

**Figure S2.** EryTE-mediated glycerolysis of priming units. **A)** TE-mediated hydrolysis has been implicated in low biocatalytic product yields. Here EryTE is also shown to catalyze glycerolysis in reaction buffers containing glycerol. **B)** HPLC trace ( $\lambda_{\text{ex}} = 565$  nm,  $\lambda_{\text{em}} = 586$  nm) reveals the generation of both the hydrolysis product **4** and the glycerolysis product **21** from priming unit **3** from reactions employing dialyzed EryMod6TE lysate. **C)** EryMod6TE mutants containing an active EryTE produce significant quantities of glycerolysis product **21**. **D)** HPLC trace ( $\lambda_{\text{ex}} = 565$  nm,  $\lambda_{\text{em}} = 586$  nm) reveals the generation of both the hydrolysis product **4** and the glycerolysis product **21** from priming unit **3** from a reaction employing purified EryTE.

Hughes, A. J., Detelich, J. F., and Keatinge-Clay, A. T. (2012) Employing a polyketide synthase module and thioesterase in the semipreparative biocatalysis of diverse triketide pyrones. *MedChemComm* **3**, 956-959.

Harper, A. D., Bailey, C. B., Edwards, A. D., Detelich, J. F., and Keatinge-Clay, A. T. (2012) Preparative, *in vitro* biocatalysis of triketide lactone chiral building blocks. *ChemBioChem* **13**, 2200-2203.

# <sup>1</sup>H NMR of 21

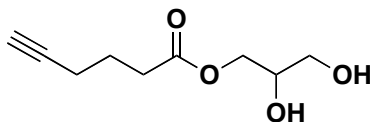

SpinWorks 3:

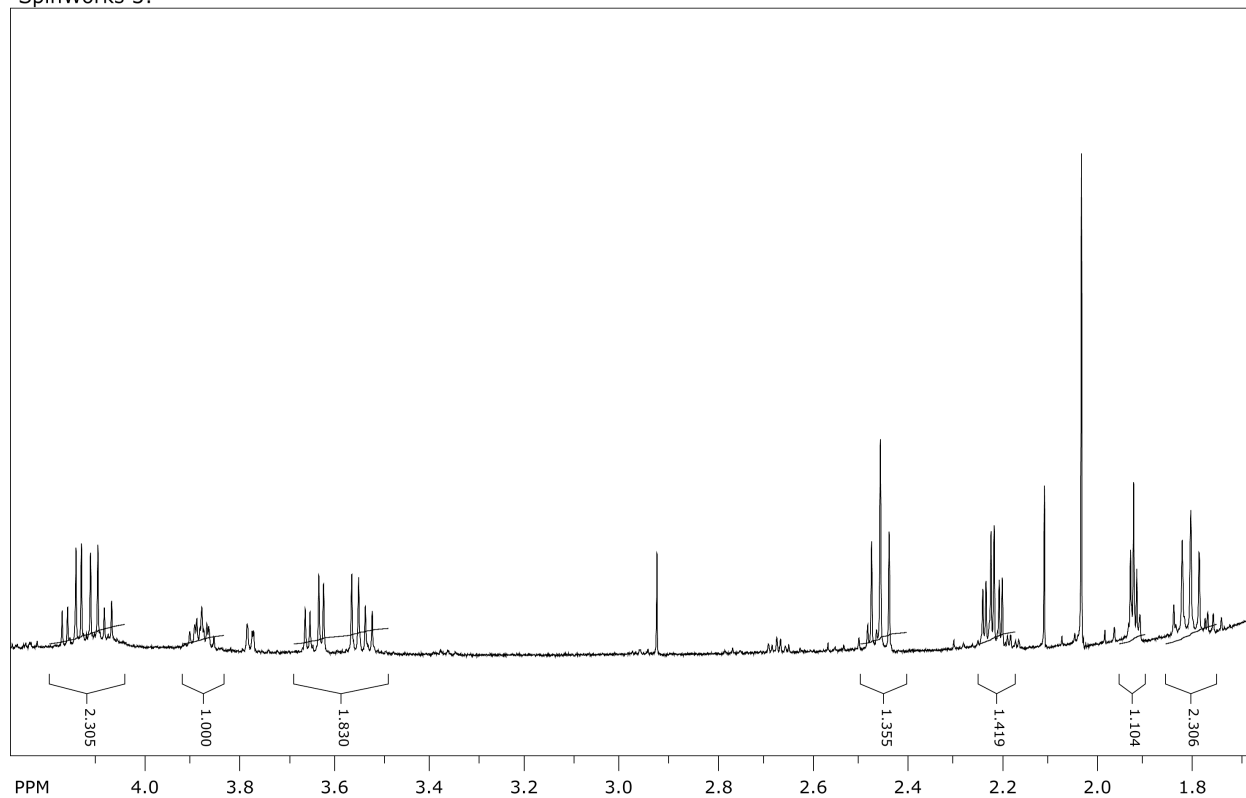

file: ...\\AJH101712\_frac5a\_s2pul\_H1.fid\\fid block# 1 expt: "s2pul"  
transmitter freq.: 399.807110 MHz  
time domain size: 51282 points  
width: 6410.26 Hz = 16.0334 ppm = 0.125000 Hz/pt  
number of scans: 8

freq. of 0 ppm: 399.804737 MHz  
processed size: 65536 complex points  
LB: 0.100 GF: 0.0000  
Hz/cm: 41.854 ppm/cm: 0.10469

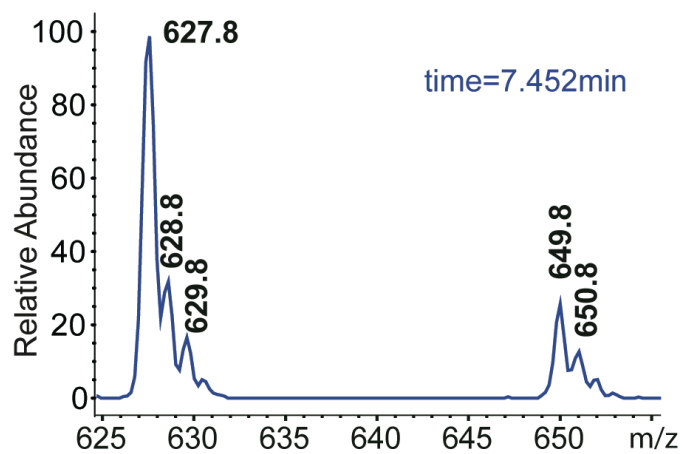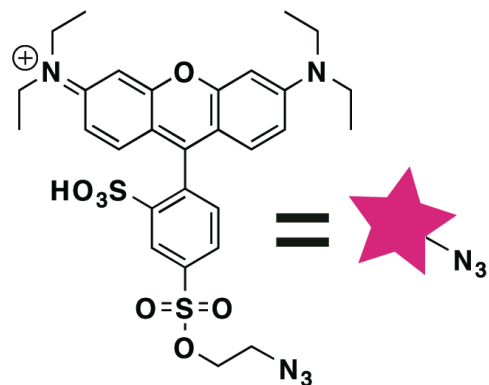

**Chemical Formula:**  $C_{29}H_{34}N_5O_7S_2^+$   
**Exact Mass:** 628.19  
**m/z:** 628.19 (100.0%), 629.19 (35.1%),  
630.19 (11.6%), 630.20 (5.0%),  
631.19 (3.1%), 631.20 (1.0%)

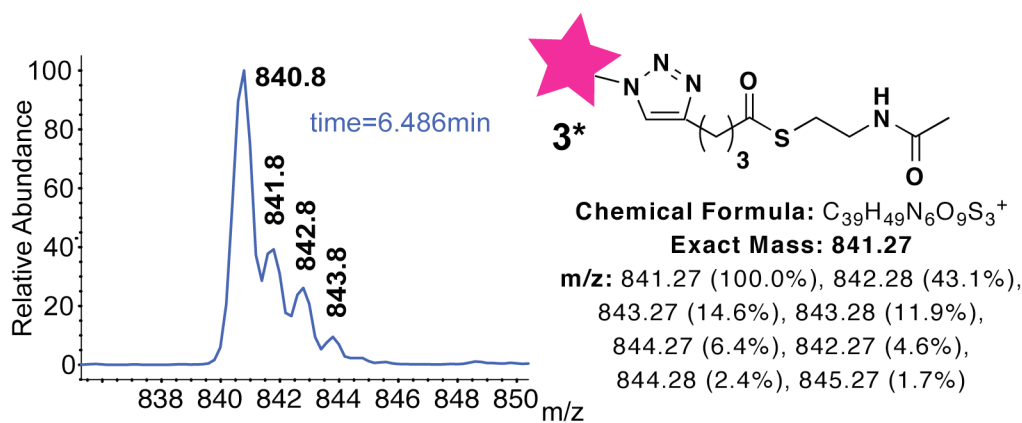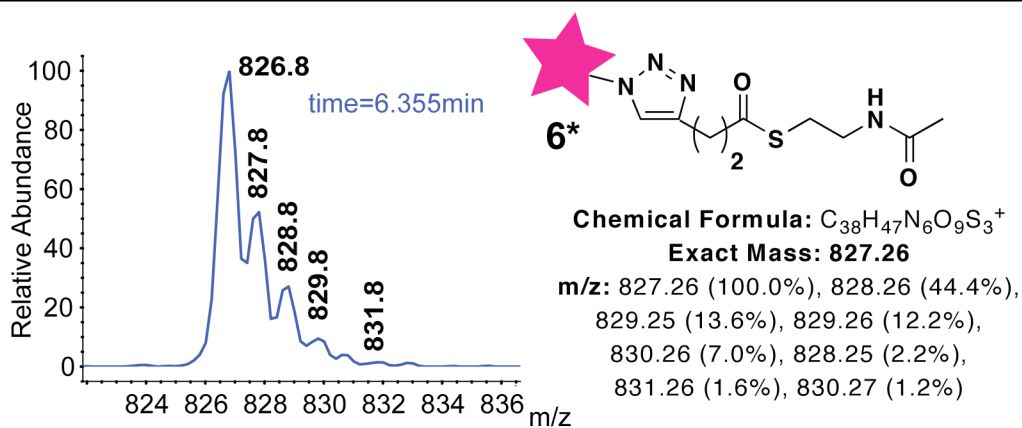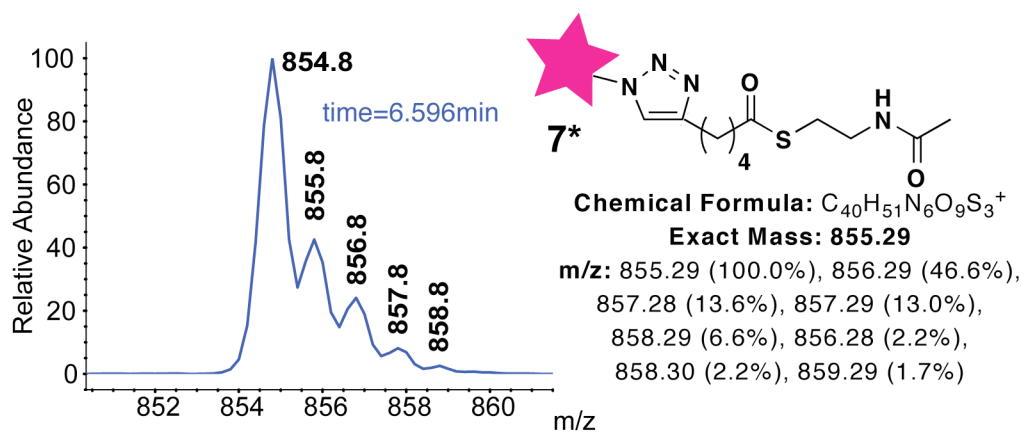

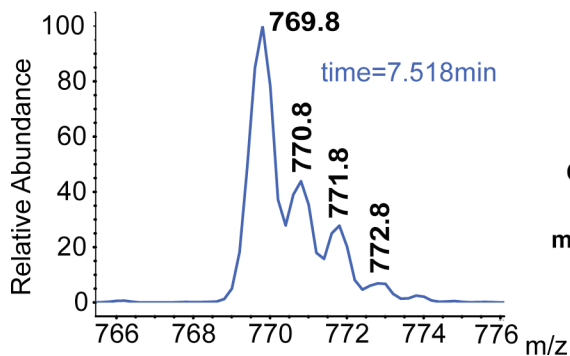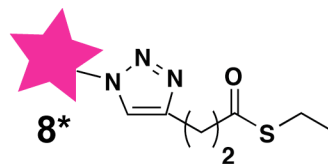

**Chemical Formula:**  $C_{36}H_{44}N_5O_8S_3^+$   
**Exact Mass:** 770.23  
**m/z:** 770.24 (100.0%), 771.24 (39.7%),  
772.23 (13.6%), 772.24 (11.0%),  
773.23 (5.8%), 771.23 (4.2%),  
774.24 (1.4%), 773.24 (1.2%)

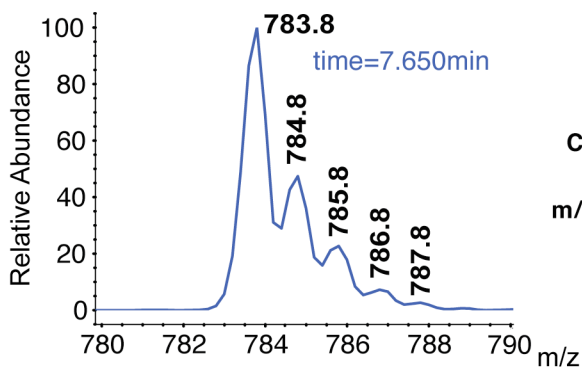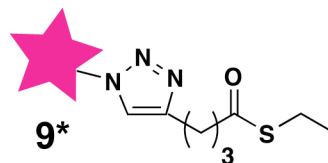

**Chemical Formula:**  $C_{37}H_{46}N_5O_8S_3^+$   
**Exact Mass:** 784.25  
**m/z:** 784.25 (100.0%), 785.25 (44.3%),  
786.25 (15.3%), 786.26 (9.8%),  
787.25 (6.0%), 787.26 (1.9%),  
788.25 (1.6%)

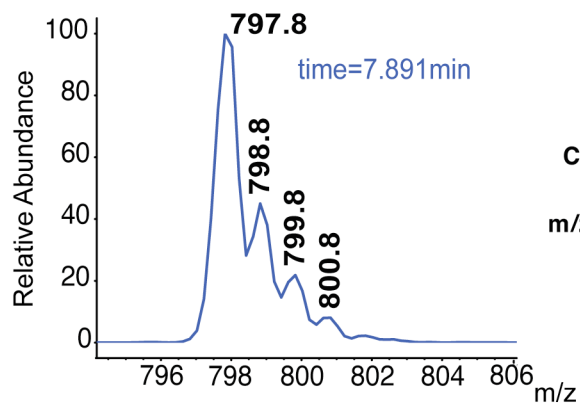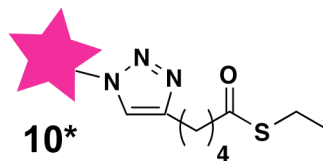

**Chemical Formula:**  $C_{38}H_{48}N_5O_8S_3^+$   
**Exact Mass:** 798.27  
**m/z:** 798.27 (100.0%), 799.27 (44.4%),  
800.26 (13.6%), 800.27 (11.8%),  
801.27 (6.8%), 799.26 (1.8%),  
802.27 (1.5%), 801.28 (1.2%)

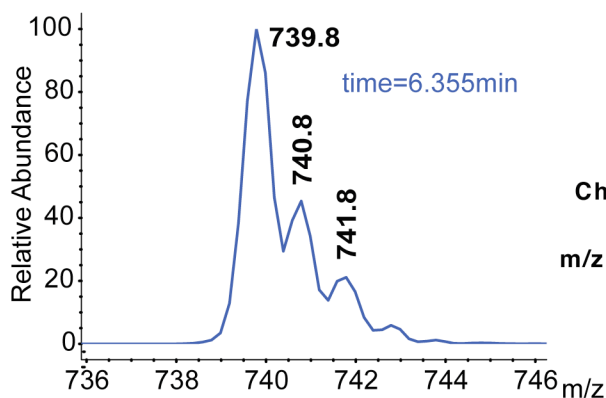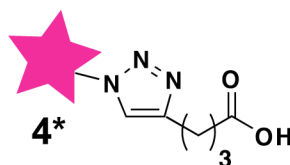

**Chemical Formula:**  $C_{35}H_{42}N_5O_9S_2^+$

**Exact Mass: 740.24**

**m/z:** 740.24 (100.0%), 741.25 (38.7%),  
742.24 (9.8%), 742.25 (9.8%),  
743.24 (3.8%), 741.24 (3.4%),  
743.25 (1.8%)

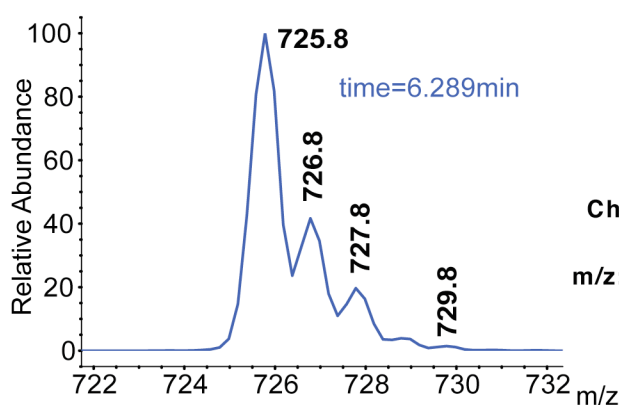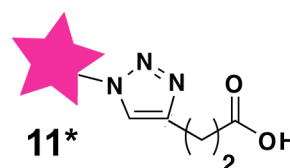

**Chemical Formula:**  $C_{34}H_{40}N_5O_9S_2^+$

**Exact Mass: 726.23**

**m/z:** 726.23 (100.0%), 727.23 (39.2%),  
728.23 (9.8%), 728.22 (9.1%),  
729.23 (4.4%), 727.22 (1.8%)

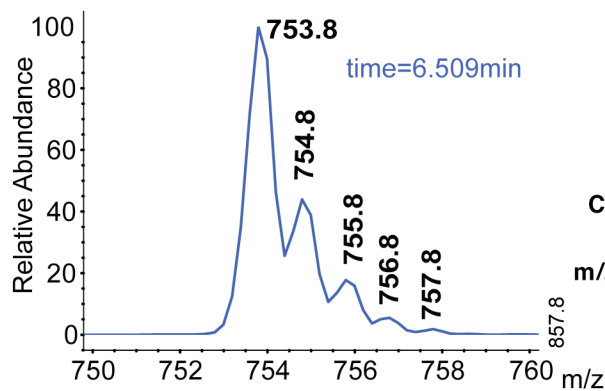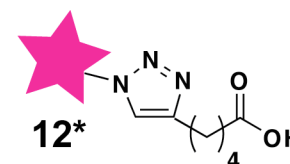

**Chemical Formula:**  $C_{36}H_{44}N_5O_9S_2^+$

**Exact Mass: 754.26**

**m/z:** 754.26 (100.0%), 755.26 (43.2%),  
756.26 (10.6%), 756.25 (9.1%),  
757.26 (3.9%), 757.27 (1.7%)



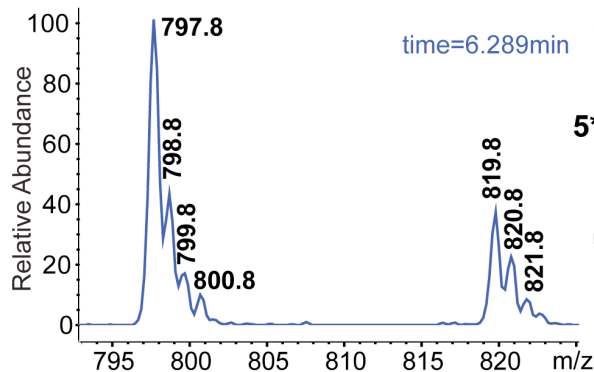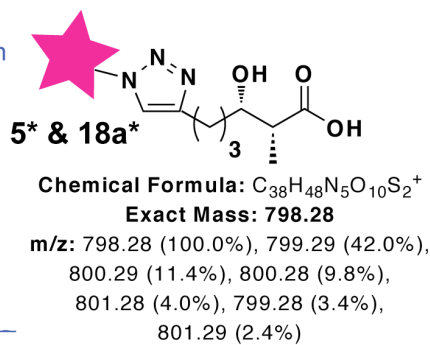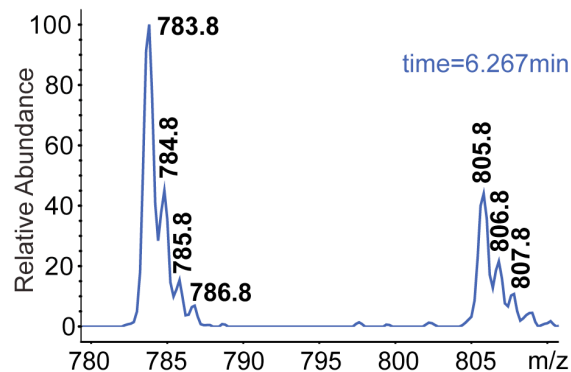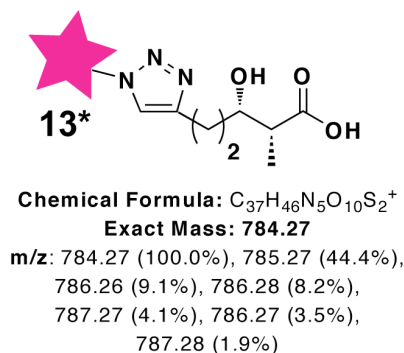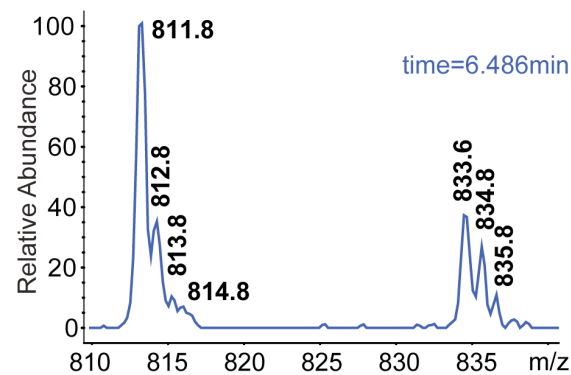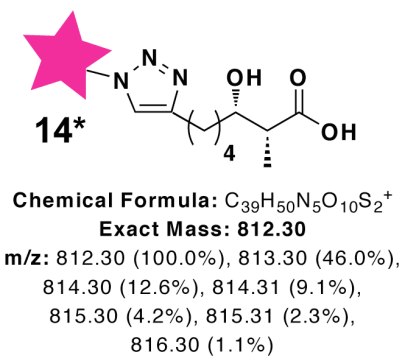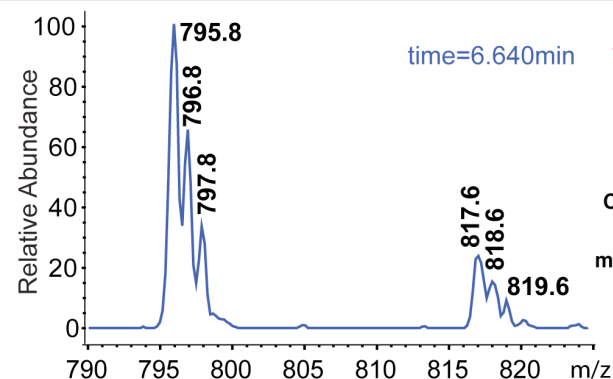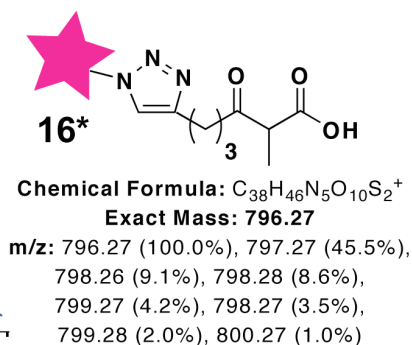

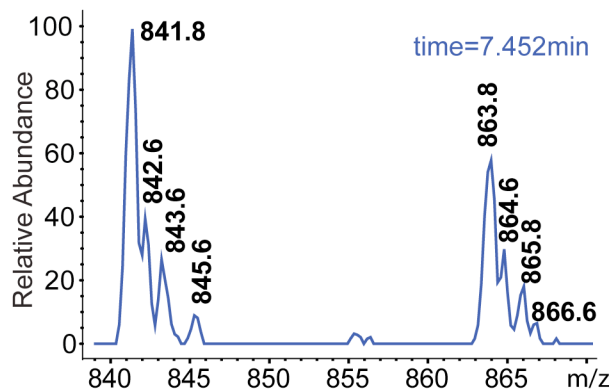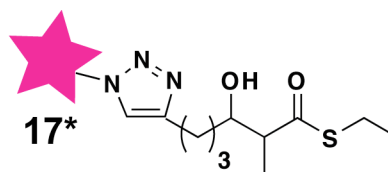

Chemical Formula:  $C_{40}H_{52}N_5O_9S_3^+$

Exact Mass: 842.29

m/z: 842.29 (100.0%), 843.30 (44.2%),  
844.29 (14.4%), 844.30 (12.5%),  
845.29 (6.5%), 843.29 (4.2%),  
845.30 (2.5%), 846.30 (1.6%)

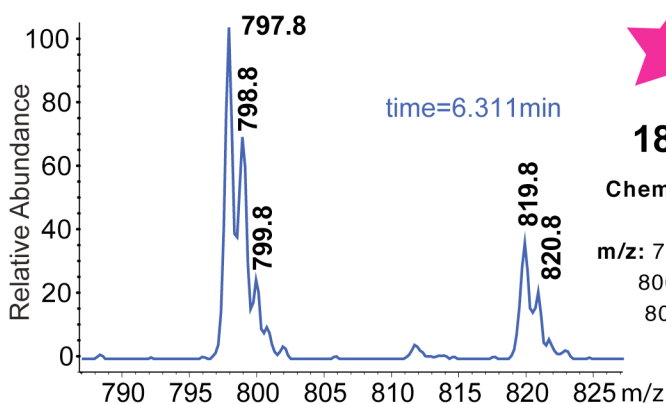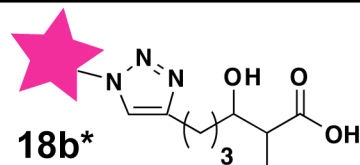

Chemical Formula:  $C_{38}H_{48}N_5O_{10}S_2^+$

Exact Mass: 798.28

m/z: 798.28 (100.0%), 799.29 (42.0%),  
800.29 (11.4%), 800.28 (9.8%),  
801.28 (4.0%), 799.28 (3.4%),  
801.29 (2.4%)

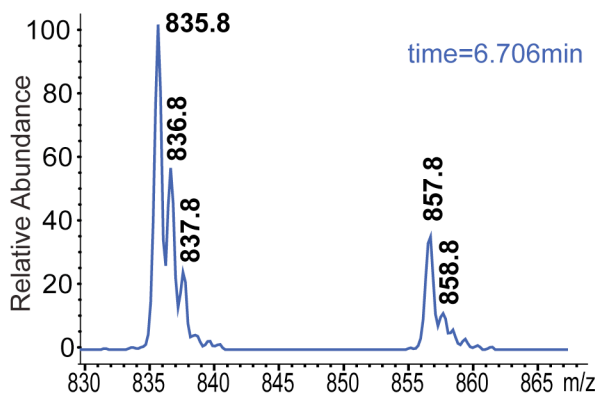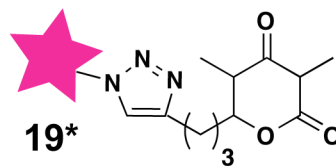

Chemical Formula:  $C_{41}H_{50}N_5O_{10}S_2^+$

Exact Mass: 836.30

m/z: 836.30 (100.0%), 837.30 (48.2%),  
838.30 (12.7%), 838.31 (10.0%),  
839.30 (4.4%), 839.31 (2.5%),  
840.30 (1.2%)

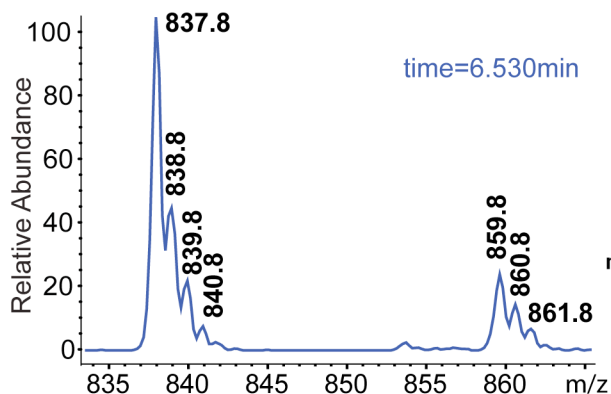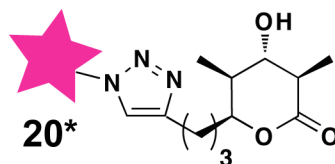

Chemical Formula:  $C_{41}H_{52}N_5O_{10}S_2^+$

Exact Mass: 838.32

m/z: 838.32 (100.0%), 839.32 (45.3%),  
840.32 (13.4%), 840.31 (9.1%),  
841.31 (4.3%), 839.31 (3.4%),  
841.33 (1.5%), 841.32 (1.4%),  
842.32 (1.2%)

### Compound 1 Reaction Analysis

#### Trial 1

|           | <b>RET Time</b> | <b>AREA</b> | <b>% Total AREA</b> |
|-----------|-----------------|-------------|---------------------|
| <b>5*</b> | 18.727          | 15787002    | 40.5                |
| <b>4*</b> | 19.294          | 19825587    | 50.9                |
| <b>3*</b> | 20.825          | 3343245     | 8.6                 |

#### Trial 2

|           | <b>RET Time</b> | <b>AREA</b> | <b>% Total AREA</b> |
|-----------|-----------------|-------------|---------------------|
| <b>5*</b> | 18.679          | 16962289    | 40.8                |
| <b>4*</b> | 19.249          | 21039755    | 50.6                |
| <b>3*</b> | 20.800          | 3606768     | 8.7                 |

| <b>Compound 1</b> |                |              |
|-------------------|----------------|--------------|
|                   | <b>AVERAGE</b> | <b>STDEV</b> |
| <b>5*</b>         | 40.6           | 0.2          |
| <b>4*</b>         | 50.7           | 0.2          |
| <b>3*</b>         | 8.6            | 0.1          |

### Compound 2 Reaction Analysis

#### Trial 1

|           | <b>Ret. Time (min)</b> | <b>AREA</b> | <b>% Total AREA</b> |
|-----------|------------------------|-------------|---------------------|
| <b>5*</b> | 18.447                 | 11912678    | 33.1                |
| <b>4*</b> | 19.030                 | 17413347    | 48.5                |
| <b>3*</b> | 20.539                 | 6613850     | 18.4                |

#### Trial 2

|           | <b>Ret. Time (min)</b> | <b>AREA</b> | <b>% Total AREA</b> |
|-----------|------------------------|-------------|---------------------|
| <b>5*</b> | 18.699                 | 15345004    | 34.5                |
| <b>4*</b> | 19.270                 | 19658811    | 44.1                |
| <b>3*</b> | 20.787                 | 9527100     | 21.4                |

| <b>Compound 2</b> |                |              |
|-------------------|----------------|--------------|
|                   | <b>AVERAGE</b> | <b>STDEV</b> |
| <b>5*</b>         | 33.8           | 0.9          |
| <b>4*</b>         | 46.3           | 3.0          |
| <b>3*</b>         | 19.9           | 2.1          |

### Compound 1 CONTROL Reaction Analysis

#### Trial 1

|           | <b>Ret. Time<br/>(min)</b> | <b>AREA</b> | <b>% Total<br/>AREA</b> |
|-----------|----------------------------|-------------|-------------------------|
| <b>4*</b> | 19.444                     | 8176075     | 20.6                    |
| <b>3*</b> | 20.910                     | 31563023    | 79.4                    |

#### Trial 2

|           | <b>Ret. Time<br/>(min)</b> | <b>AREA</b> | <b>% Total<br/>AREA</b> |
|-----------|----------------------------|-------------|-------------------------|
| <b>4*</b> | 19.490                     | 6260615     | 17.5                    |
| <b>3*</b> | 21.007                     | 29561878    | 82.5                    |

| Compound 1 CONTROL |                |              |
|--------------------|----------------|--------------|
|                    | <b>AVERAGE</b> | <b>STDEV</b> |
| <b>4*</b>          | 19.0           | 2.2          |
| <b>3*</b>          | 81.0           | 2.2          |

### Compound 2 CONTROL Reaction Analysis

#### Trial 1

|           | <b>Ret. Time<br/>(min)</b> | <b>AREA</b> | <b>% Total<br/>AREA</b> |
|-----------|----------------------------|-------------|-------------------------|
| <b>4*</b> | 19.444                     | 5960798     | 15.8                    |
| <b>3*</b> | 20.977                     | 31720433    | 84.2                    |

#### Trial 2

|           | <b>Ret. Time<br/>(min)</b> | <b>AREA</b> | <b>% Total<br/>AREA</b> |
|-----------|----------------------------|-------------|-------------------------|
| <b>4*</b> | 19.485                     | 5514672     | 15.0                    |
| <b>3*</b> | 21.087                     | 31295599    | 85.0                    |

| Compound 2 CONTROL |                |              |
|--------------------|----------------|--------------|
|                    | <b>AVERAGE</b> | <b>STDEV</b> |
| <b>4*</b>          | 15.4           | 0.6          |
| <b>3*</b>          | 84.6           | 0.6          |

### Compound 6 Reaction Analysis

#### Trial 1

|            | <b>Ret. Time<br/>(min)</b> | <b>AREA</b> | <b>% Total<br/>AREA</b> |
|------------|----------------------------|-------------|-------------------------|
| <b>13*</b> | 17.809                     | 9013751     | 20.7                    |
| <b>11*</b> | 18.680                     | 22850133    | 52.6                    |
| <b>6*</b>  | 20.194                     | 11593317    | 26.7                    |

#### Trial 2

|            | <b>Ret. Time<br/>(min)</b> | <b>AREA</b> | <b>% Total<br/>AREA</b> |
|------------|----------------------------|-------------|-------------------------|
| <b>13*</b> | 17.592                     | 8347381     | 16.6                    |
| <b>11*</b> | 18.484                     | 25467750    | 50.8                    |
| <b>6*</b>  | 19.930                     | 16329898    | 32.6                    |

| <b>Compound 6</b> |                |              |
|-------------------|----------------|--------------|
|                   | <b>AVERAGE</b> | <b>STDEV</b> |
| <b>13*</b>        | 18.7           | 2.9          |
| <b>11*</b>        | 51.7           | 1.3          |
| <b>6*</b>         | 29.6           | 4.2          |

### Compound 8 Reaction Analysis

#### Trial 1

|            | <b>Ret. Time<br/>(min)</b> | <b>AREA</b> | <b>% Total<br/>AREA</b> |
|------------|----------------------------|-------------|-------------------------|
| <b>13*</b> | 17.867                     | 7061148     | 20.6                    |
| <b>11*</b> | 18.714                     | 23420844    | 68.3                    |
| <b>8*</b>  | 35.014                     | 3821288     | 11.1                    |

#### Trial 2

|            | <b>Ret. Time<br/>(min)</b> | <b>AREA</b> | <b>% Total<br/>AREA</b> |
|------------|----------------------------|-------------|-------------------------|
| <b>13*</b> | 17.842                     | 10990448    | 26.6                    |
| <b>11*</b> | 18.752                     | 25630547    | 62.1                    |
| <b>8*</b>  | 35.048                     | 4675599     | 11.3                    |

| <b>Compound 8</b> |                |              |
|-------------------|----------------|--------------|
|                   | <b>AVERAGE</b> | <b>STDEV</b> |
| <b>13*</b>        | 23.6           | 4.3          |
| <b>11*</b>        | 65.2           | 4.4          |
| <b>8*</b>         | 11.2           | 0.1          |

### Compound 6 CONTROL Reaction Analysis

#### Trial 1

|            | <b>Ret. Time<br/>(min)</b> | <b>AREA</b> | <b>% Total<br/>AREA</b> |
|------------|----------------------------|-------------|-------------------------|
| <b>11*</b> | 18.737                     | 172204      | 0.5                     |
| <b>6*</b>  | 20.024                     | 37911066    | 99.5                    |

#### Trial 2

|            | <b>Ret. Time<br/>(min)</b> | <b>AREA</b> | <b>% Total<br/>AREA</b> |
|------------|----------------------------|-------------|-------------------------|
| <b>11*</b> | 18.465                     | 2424183     | 6.1                     |
| <b>6*</b>  | 19.745                     | 37329938    | 93.9                    |

| Compound 6 CONTROL |                |              |
|--------------------|----------------|--------------|
|                    | <b>AVERAGE</b> | <b>STDEV</b> |
| <b>11*</b>         | 3.3            | 4.0          |
| <b>6*</b>          | 96.7           | 4.0          |

### Compound 8 CONTROL Reaction Analysis

#### Trial 1

|            | <b>Ret. Time<br/>(min)</b> | <b>AREA</b> | <b>% Total<br/>AREA</b> |
|------------|----------------------------|-------------|-------------------------|
| <b>11*</b> | 18.755                     | 212419      | 0.6                     |
| <b>8*</b>  | 33.681                     | 36043103    | 99.4                    |

#### Trial 2

|            | <b>Ret. Time<br/>(min)</b> | <b>AREA</b> | <b>% Total<br/>AREA</b> |
|------------|----------------------------|-------------|-------------------------|
| <b>11*</b> | 18.827                     | 2710007     | 6.1                     |
| <b>8*</b>  | 33.460                     | 41899558    | 93.9                    |

| Compound 8 CONTROL |                |              |
|--------------------|----------------|--------------|
|                    | <b>AVERAGE</b> | <b>STDEV</b> |
| <b>11*</b>         | 3.3            | 3.9          |
| <b>8*</b>          | 96.7           | 3.9          |

### Compound 3 Reaction Analysis

#### Trial 1

|           | <b>Ret. Time<br/>(min)</b> | <b>AREA</b> | <b>% Total<br/>AREA</b> |
|-----------|----------------------------|-------------|-------------------------|
| <b>5*</b> | 18.620                     | 15828462    | 28.3                    |
| <b>4*</b> | 19.092                     | 33896564    | 60.6                    |
| <b>3*</b> | 20.719                     | 6183995     | 11.1                    |

#### Trial 2

|           | <b>Ret. Time<br/>(min)</b> | <b>AREA</b> | <b>% Total<br/>AREA</b> |
|-----------|----------------------------|-------------|-------------------------|
| <b>5*</b> | 18.464                     | 11380788    | 27.1                    |
| <b>4*</b> | 19.105                     | 23650841    | 56.3                    |
| <b>3*</b> | 20.509                     | 6981340     | 16.6                    |

| <b>Compound 3</b> |                |              |
|-------------------|----------------|--------------|
|                   | <b>AVERAGE</b> | <b>STDEV</b> |
| <b>5*</b>         | 27.7           | 0.9          |
| <b>4*</b>         | 58.5           | 3.1          |
| <b>3*</b>         | 13.8           | 3.9          |

### Compound 9 Reaction Analysis

#### Trial 1

|           | <b>Ret. Time<br/>(min)</b> | <b>AREA</b> | <b>% Total<br/>AREA</b> |
|-----------|----------------------------|-------------|-------------------------|
| <b>5*</b> | 18.692                     | 14020189    | 31.5                    |
| <b>4*</b> | 19.374                     | 26711265    | 60.0                    |
| <b>9*</b> | 36.719                     | 3814999     | 8.6                     |

#### Trial 2

|           | <b>Ret. Time<br/>(min)</b> | <b>AREA</b> | <b>% Total<br/>AREA</b> |
|-----------|----------------------------|-------------|-------------------------|
| <b>5*</b> | 18.697                     | 14966330    | 32.9                    |
| <b>4*</b> | 19.342                     | 26192166    | 57.6                    |
| <b>9*</b> | 36.746                     | 4290108     | 9.4                     |

| <b>Compound 9</b> |                |              |
|-------------------|----------------|--------------|
|                   | <b>AVERAGE</b> | <b>STDEV</b> |
| <b>5*</b>         | 32.2           | 1.0          |
| <b>4*</b>         | 58.8           | 1.6          |
| <b>9*</b>         | 9.0            | 0.6          |

### Compound 3 CONTROL Reaction Analysis

#### Trial 1

|           | <b>Ret. Time<br/>(min)</b> | <b>AREA</b> | <b>% Total<br/>AREA</b> |
|-----------|----------------------------|-------------|-------------------------|
| <b>4*</b> | 19.359                     | 6049863     | 15.9                    |
| <b>3*</b> | 20.760                     | 31884840    | 84.1                    |

#### Trial 2

|           | <b>Ret. Time<br/>(min)</b> | <b>AREA</b> | <b>% Total<br/>AREA</b> |
|-----------|----------------------------|-------------|-------------------------|
| <b>4*</b> | 19.330                     | 6555358     | 16.5                    |
| <b>3*</b> | 20.849                     | 33124632    | 83.5                    |

| Compound 3 CONTROL |                |              |
|--------------------|----------------|--------------|
|                    | <b>AVERAGE</b> | <b>STDEV</b> |
| <b>4*</b>          | 16.2           | 0.4          |
| <b>3*</b>          | 83.8           | 0.4          |

### Compound 9 CONTROL Reaction Analysis

#### Trial 1

|           | <b>Ret. Time<br/>(min)</b> | <b>AREA</b> | <b>% Total<br/>AREA</b> |
|-----------|----------------------------|-------------|-------------------------|
| <b>4*</b> | 19.300                     | 594660      | 4.0                     |
| <b>9*</b> | 36.803                     | 14175016    | 96.0                    |

#### Trial 2

|           | <b>Ret. Time<br/>(min)</b> | <b>AREA</b> | <b>% Total<br/>AREA</b> |
|-----------|----------------------------|-------------|-------------------------|
| <b>4*</b> | 19.314                     | 500041      | 2.8                     |
| <b>9*</b> | 36.754                     | 17355117    | 97.2                    |

| Compound 9 CONTROL |                |              |
|--------------------|----------------|--------------|
|                    | <b>AVERAGE</b> | <b>STDEV</b> |
| <b>4*</b>          | 3.4            | 0.9          |
| <b>9*</b>          | 96.6           | 0.9          |



### Compound 7 Reaction Analysis

#### Trial 1

|            | <b>Ret. Time<br/>(min)</b> | <b>AREA</b> | <b>% Total<br/>AREA</b> |
|------------|----------------------------|-------------|-------------------------|
| <b>14*</b> | 20.08                      | 11581283    | 25.46                   |
| <b>12*</b> | 20.68                      | 32761857    | 72.03                   |
| <b>7*</b>  | 22.69                      | 1138304     | 2.50                    |

#### Trial 2

|            | <b>Ret. Time<br/>(min)</b> | <b>AREA</b> | <b>% Total<br/>AREA</b> |
|------------|----------------------------|-------------|-------------------------|
| <b>14*</b> | 20.16                      | 10643821    | 23.85                   |
| <b>12*</b> | 20.71                      | 33422377    | 74.89                   |
| <b>7*</b>  | 22.70                      | 564438      | 1.26                    |

| <b>Compound 7</b> |                |              |
|-------------------|----------------|--------------|
|                   | <b>AVERAGE</b> | <b>STDEV</b> |
| <b>14*</b>        | 24.7           | 1.1          |
| <b>12*</b>        | 73.5           | 2.0          |
| <b>7*</b>         | 1.9            | 0.9          |

### Compound 10 Reaction Analysis

#### Trial 1

|            | <b>Ret. Time<br/>(min)</b> | <b>AREA</b> | <b>% Total<br/>AREA</b> |
|------------|----------------------------|-------------|-------------------------|
| <b>14*</b> | 20.16                      | 10535136    | 22.95                   |
| <b>12*</b> | 20.66                      | 34727449    | 75.66                   |
| <b>10*</b> | 39.71                      | 637867      | 1.39                    |

#### Trial 2

|            | <b>Ret. Time<br/>(min)</b> | <b>AREA</b> | <b>% Total<br/>Area</b> |
|------------|----------------------------|-------------|-------------------------|
| <b>14*</b> | 20.09                      | 8001594     | 19.65                   |
| <b>12*</b> | 20.62                      | 30425013    | 74.71                   |
| <b>10*</b> | 38.95                      | 2299424     | 5.65                    |

| <b>Compound 10</b> |                |              |
|--------------------|----------------|--------------|
|                    | <b>AVERAGE</b> | <b>STDEV</b> |
| <b>14*</b>         | 21.3           | 2.3          |
| <b>12*</b>         | 75.2           | 0.7          |
| <b>10*</b>         | 3.5            | 3.0          |

### Compound 7 CONTROL Reaction Analysis

#### Trial 1

|            | <b>Ret. Time<br/>(min)</b> | <b>AREA</b> | <b>% Total<br/>AREA</b> |
|------------|----------------------------|-------------|-------------------------|
| <b>12*</b> | 20.814                     | 23100604    | 41.1                    |
| <b>7*</b>  | 22.619                     | 33168434    | 58.9                    |

#### Trial 2

|            | <b>Ret. Time<br/>(min)</b> | <b>AREA</b> | <b>%total<br/>AREA</b> |
|------------|----------------------------|-------------|------------------------|
| <b>12*</b> | 20.655                     | 25015046    | 43.3                   |
| <b>7*</b>  | 22.619                     | 32755287    | 56.7                   |

| Compound 7 CONTROL |                |              |
|--------------------|----------------|--------------|
|                    | <b>AVERAGE</b> | <b>STDEV</b> |
| <b>12*</b>         | 42.2           | 1.6          |
| <b>7*</b>          | 57.8           | 1.6          |

### Compound 10 CONTROL Reaction Analysis

#### Trial 1

|            | <b>Ret. Time<br/>(min)</b> | <b>AREA</b> | <b>% Total<br/>AREA</b> |
|------------|----------------------------|-------------|-------------------------|
| <b>12*</b> | 20.822                     | 9162547     | 51.7                    |
| <b>10*</b> | 39.851                     | 8562374     | 48.3                    |

#### Trial 2

|            | <b>Ret. Time<br/>(min)</b> | <b>AREA</b> | <b>% Total<br/>AREA</b> |
|------------|----------------------------|-------------|-------------------------|
| <b>12*</b> | 20.795                     | 12754036    | 62.3                    |
| <b>10*</b> | 39.769                     | 7724401     | 37.7                    |

| Compound 10 CONTROL |                |              |
|---------------------|----------------|--------------|
|                     | <b>AVERAGE</b> | <b>STDEV</b> |
| <b>12*</b>          | 57.0           | 7.5          |
| <b>10*</b>          | 43.0           | 7.5          |

Compound 3 – 0 mM Phosphate – 2 hrs - Reaction Analysis

Trial 1

|    | Ret. Time (min) | AREA     | % Total AREA |
|----|-----------------|----------|--------------|
| 5* | 18.665          | 14806840 | 21.3         |
| 4* | 19.232          | 22840606 | 32.8         |
| 3* | 20.822          | 31899164 | 45.9         |

| 0 mM Phosphate- 2 hrs |         |       |
|-----------------------|---------|-------|
|                       | AVERAGE | STDEV |
| 5*                    | 22.0    | 1.0   |
| 4*                    | 33.2    | 0.5   |
| 3*                    | 44.8    | 1.5   |

Trial 2

|    | Ret. Time (min) | AREA     | % Total AREA |
|----|-----------------|----------|--------------|
| 5* | 18.867          | 13023723 | 22.8         |
| 4* | 19.407          | 19204279 | 33.5         |
| 3* | 20.987          | 25014238 | 43.7         |

Compound 3 – 10 mM Phosphate – 2 hrs - Reaction Analysis

Trial 1

|    | Ret. Time (min) | AREA     | % Total AREA |
|----|-----------------|----------|--------------|
| 5* | 18.580          | 15802446 | 23.1         |
| 4* | 19.244          | 23049643 | 33.7         |
| 3* | 20.774          | 29464589 | 43.1         |

| 10 mM Phosphate- 2 hrs |         |       |
|------------------------|---------|-------|
|                        | AVERAGE | STDEV |
| 5*                     | 24.8    | 2.3   |
| 4*                     | 34.6    | 1.2   |
| 3*                     | 40.6    | 3.5   |

Trial 2

|    | Ret. Time (min) | AREA     | % Total AREA |
|----|-----------------|----------|--------------|
| 5* | 18.890          | 13553917 | 26.4         |
| 4* | 19.424          | 18227682 | 35.5         |
| 3* | 21.020          | 19587930 | 38.1         |

Compound 3 – 50 mM Phosphate – 2 hrs - Reaction Analysis

Trial 1

|    | Ret. Time (min) | AREA     | % Total AREA |
|----|-----------------|----------|--------------|
| 5* | 18.464          | 16814392 | 29.4         |
| 4* | 19.019          | 21047074 | 36.8         |
| 3* | 20.539          | 19366060 | 33.8         |

| 50 mM Phosphate- 2 hrs |         |       |
|------------------------|---------|-------|
|                        | AVERAGE | STDEV |
| 5*                     | 29.1    | 0.4   |
| 4*                     | 36.0    | 1.1   |
| 3*                     | 34.9    | 1.5   |

Trial 2

|    | Ret. Time (min) | AREA     | % Total AREA |
|----|-----------------|----------|--------------|
| 5* | 18.777          | 15811837 | 28.8         |
| 4* | 19.325          | 19405246 | 35.3         |
| 3* | 20.905          | 19771894 | 36.0         |

Compound 3 – 100 mM Phosphate – 2 hrs - Reaction Analysis

Trial 1

|           | <b>Ret. Time<br/>(min)</b> | <b>AREA</b> | <b>% Total<br/>AREA</b> |
|-----------|----------------------------|-------------|-------------------------|
| <b>5*</b> | 18.492                     | 20585641    | 31.5                    |
| <b>4*</b> | 19.125                     | 28318670    | 43.3                    |
| <b>3*</b> | 20.640                     | 16505850    | 25.2                    |

Trial 2

|           | <b>Ret. Time<br/>(min)</b> | <b>AREA</b> | <b>% Total<br/>AREA</b> |
|-----------|----------------------------|-------------|-------------------------|
| <b>5*</b> | 18.862                     | 19556396    | 34.4                    |
| <b>4*</b> | 19.404                     | 26989181    | 47.5                    |
| <b>3*</b> | 21.020                     | 10325964    | 18.2                    |

| 100 mM Phosphate - 2 hrs |                |              |
|--------------------------|----------------|--------------|
|                          | <b>AVERAGE</b> | <b>STDEV</b> |
| <b>5*</b>                | 32.9           | 2.1          |
| <b>4*</b>                | 45.4           | 2.9          |
| <b>3*</b>                | 21.7           | 5.0          |

Compound 3 – 0 mM Phosphate – 16 hrs - Reaction Analysis

Trial 1

|    | Ret. Time (min) | AREA     | % Total AREA |
|----|-----------------|----------|--------------|
| 5* | 18.669          | 16536904 | 37.1         |
| 4* | 19.250          | 23683668 | 53.1         |
| 3* | 20.779          | 4360206  | 9.8          |

Trial 2

|    | Ret. Time (min) | AREA     | % Total AREA |
|----|-----------------|----------|--------------|
| 5* | 18.740          | 15832878 | 35.6         |
| 4* | 19.330          | 22474980 | 50.5         |
| 3* | 20.864          | 6184094  | 13.9         |

| 0 mM Phosphate - 16 hrs |         |       |
|-------------------------|---------|-------|
|                         | AVERAGE | STDEV |
| 5*                      | 36.3    | 1.1   |
| 4*                      | 51.8    | 1.8   |
| 3*                      | 11.8    | 2.9   |

Compound 3 – 10 mM Phosphate – 16 hrs - Reaction Analysis

Trial 1

|    | Ret. Time (min) | AREA     | % Total AREA |
|----|-----------------|----------|--------------|
| 5* | 18.712          | 19279548 | 40.0         |
| 4* | 19.317          | 26531272 | 55.1         |
| 3* | 20.825          | 2328798  | 4.8          |

Trial 2

|    | Ret. Time (min) | AREA     | % Total AREA |
|----|-----------------|----------|--------------|
| 5* | 18.382          | 19807554 | 38.8         |
| 4* | 19.004          | 28157616 | 55.1         |
| 3* | 20.495          | 3145642  | 6.2          |

| 10 mM Phosphate - 16 hrs |         |       |
|--------------------------|---------|-------|
|                          | AVERAGE | STDEV |
| 5*                       | 39.4    | 0.9   |
| 4*                       | 55.1    | 0.0   |
| 3*                       | 5.5     | 0.9   |

Compound 3 – 50 mM Phosphate – 16 hrs - Reaction Analysis

Trial 1

|    | Ret. Time (min) | AREA     | % Total AREA |
|----|-----------------|----------|--------------|
| 5* | 18.617          | 24264845 | 43.2         |
| 4* | 19.374          | 31903020 | 56.8         |

Trial 2

|    | Ret. Time (min) | AREA     | % Total AREA |
|----|-----------------|----------|--------------|
| 5* | 18.642          | 20931892 | 43.0         |
| 4* | 19.279          | 27803314 | 57.0         |

| 50 mM Phosphate – 16 hrs |         |       |
|--------------------------|---------|-------|
|                          | AVERAGE | STDEV |
| 5*                       | 43.1    | 0.2   |
| 4*                       | 56.9    | 0.2   |

Compound 3 – 100 mM Phosphate – 16 hrs - Reaction Analysis

Trial 1

|           | <b>Ret. Time<br/>(min)</b> | <b>AREA</b> | <b>% Total<br/>AREA</b> |
|-----------|----------------------------|-------------|-------------------------|
| <b>5*</b> | 18.745                     | 22205349    | 42.1                    |
| <b>4*</b> | 19.300                     | 30532660    | 57.9                    |

Trial 2

|           | <b>Ret. Time<br/>(min)</b> | <b>AREA</b> | <b>% Total<br/>AREA</b> |
|-----------|----------------------------|-------------|-------------------------|
| <b>5*</b> | 18.657                     | 19918332    | 43.3                    |
| <b>4*</b> | 19.212                     | 26066248    | 56.7                    |

| 100 mM Phosphate – 16 hrs |                |              |
|---------------------------|----------------|--------------|
|                           | <b>AVERAGE</b> | <b>STDEV</b> |
| <b>5*</b>                 | 42.7           | 0.9          |
| <b>4*</b>                 | 57.3           | 0.9          |

Compound 3 – 0 mM Phosphate – 16 hrs CONTROL Reaction Analysis

Trial 1

|           | <b>Ret. Time<br/>(min)</b> | <b>AREA</b> | <b>% Total<br/>AREA</b> |
|-----------|----------------------------|-------------|-------------------------|
| <b>4*</b> | 19.317                     | 6028704     | 14.9                    |
| <b>3*</b> | 19.945                     | 34549471    | 85.1                    |

Trial 2

|           | <b>Ret. Time<br/>(min)</b> | <b>AREA</b> | <b>% Total<br/>AREA</b> |
|-----------|----------------------------|-------------|-------------------------|
| <b>4*</b> | 19.295                     | 6749666     | 16.2                    |
| <b>3*</b> | 20.769                     | 34841101    | 83.8                    |

| 0 mM Phosphate CONTROL |                |              |
|------------------------|----------------|--------------|
|                        | <b>AVERAGE</b> | <b>STDEV</b> |
| <b>4*</b>              | 15.5           | 1.0          |
| <b>3*</b>              | 84.5           | 1.0          |

Compound 3 – 10 mM Phosphate – 16 hrs CONTROL Reaction Analysis

Trial 1

|           | <b>Ret. Time<br/>(min)</b> | <b>AREA</b> | <b>% Total<br/>AREA</b> |
|-----------|----------------------------|-------------|-------------------------|
| <b>4*</b> | 19.164                     | 6257779     | 15.1                    |
| <b>3*</b> | 20.692                     | 35150517    | 84.9                    |

Trial 2

|           | <b>Ret. Time<br/>(min)</b> | <b>AREA</b> | <b>% Total<br/>AREA</b> |
|-----------|----------------------------|-------------|-------------------------|
| <b>4*</b> | 19.279                     | 6576249     | 15.4                    |
| <b>3*</b> | 20.592                     | 36009401    | 84.6                    |

| 10 mM Phosphate CONTROL |                |              |
|-------------------------|----------------|--------------|
|                         | <b>AVERAGE</b> | <b>STDEV</b> |
| <b>4*</b>               | 15.3           | 0.2          |
| <b>3*</b>               | 84.7           | 0.2          |

Compound 3 – 50 mM Phosphate – 16 hrs CONTROL Reaction Analysis

Trial 1

|           | <b>Ret. Time<br/>(min)</b> | <b>AREA</b> | <b>% Total<br/>AREA</b> |
|-----------|----------------------------|-------------|-------------------------|
| <b>4*</b> | 19.275                     | 8543020     | 19.9                    |
| <b>3*</b> | 20.612                     | 34470898    | 80.1                    |

Trial 2

|           | <b>Ret. Time<br/>(min)</b> | <b>AREA</b> | <b>% Total<br/>AREA</b> |
|-----------|----------------------------|-------------|-------------------------|
| <b>4*</b> | 19.310                     | 7864313     | 18.3                    |
| <b>3*</b> | 20.894                     | 35083973    | 81.7                    |

| 50 mM Phosphate CONTROL |                |              |
|-------------------------|----------------|--------------|
|                         | <b>AVERAGE</b> | <b>STDEV</b> |
| <b>4*</b>               | 19.1           | 1.1          |
| <b>3*</b>               | 80.9           | 1.1          |

Compound 3 – 100 mM Phosphate – 16 hrs CONTROL Reaction Analysis

Trial 1

|           | <b>Ret. Time<br/>(min)</b> | <b>AREA</b> | <b>% Total<br/>AREA</b> |
|-----------|----------------------------|-------------|-------------------------|
| <b>4*</b> | 19.294                     | 7648977     | 18.5                    |
| <b>3*</b> | 20.710                     | 33648585    | 81.5                    |

Trial 2

|           | <b>Ret. Time<br/>(min)</b> | <b>AREA</b> | <b>% Total<br/>AREA</b> |
|-----------|----------------------------|-------------|-------------------------|
| <b>4*</b> | 19.274                     | 9948370     | 23.0                    |
| <b>3*</b> | 20.677                     | 33388648    | 77.0                    |

| 100 mM Phosphate CONTROL |                |              |
|--------------------------|----------------|--------------|
|                          | <b>AVERAGE</b> | <b>STDEV</b> |
| <b>4*</b>                | 20.7           | 3.1          |
| <b>3*</b>                | 79.3           | 3.1          |



### Compound 15 Reaction Analysis

#### Trial 1

|             | <b>Ret. Time<br/>(min)</b> | <b>AREA</b> | <b>% Total<br/>AREA</b> |
|-------------|----------------------------|-------------|-------------------------|
| <b>18a*</b> | 18.590                     | 13305217    | 23.8                    |
| <b>18b*</b> | 19.122                     | 7131187     | 12.8                    |
| <b>20*</b>  | 21.575                     | 18279563    | 32.7                    |
| <b>16*</b>  | 22.539                     | 5606334     | 10.0                    |
| <b>19*</b>  | 23.498                     | 11526588    | 20.6                    |

#### Trial 2

|             | <b>Ret. Time<br/>(min)</b> | <b>AREA</b> | <b>% Total<br/>AREA</b> |
|-------------|----------------------------|-------------|-------------------------|
| <b>18a*</b> | 18.845                     | 12387653    | 24.4                    |
| <b>18b*</b> | 19.372                     | 7118427     | 14.0                    |
| <b>20*</b>  | 21.860                     | 16615907    | 32.7                    |
| <b>16*</b>  | 22.774                     | 4820335     | 9.5                     |
| <b>19*</b>  | 23.727                     | 9887625     | 19.5                    |

| <b>Compound 15</b> |                |              |
|--------------------|----------------|--------------|
|                    | <b>AVERAGE</b> | <b>STDEV</b> |
| <b>18a*</b>        | 24.1           | 0.4          |
| <b>18b*</b>        | 13.4           | 0.9          |
| <b>20*</b>         | 32.7           | 0.0          |
| <b>16*</b>         | 9.8            | 0.4          |
| <b>19*</b>         | 20.0           | 0.8          |

### Compound 3 EryMod6TE Mutant Reaction Analysis

#### AREA

|            | <b>EryMod6TE</b> | <b>ΔKS</b> | <b>ΔAT</b> | <b>ΔTE</b> |
|------------|------------------|------------|------------|------------|
| <b>21*</b> | 2614798          | 1554339    | 2198173    | 372883     |
| <b>4*</b>  | 826717           | 1509532    | 1235584    | 859962     |
| <b>3*</b>  | 3951371          | 4797879    | 3931098    | 5868967    |
| Total AREA | 7392886          | 7861750    | 7364855    | 7101812    |

|            | <b>ΔKS+AT</b> | <b>ΔKS+TE</b> | <b>ΔAT+TE</b> | <b>no EryMod6TE</b> |
|------------|---------------|---------------|---------------|---------------------|
| <b>21*</b> | 1708062       | 479870        | 409617        | 166666              |
| <b>4*</b>  | 1138868       | 1127082       | 993593        | 0                   |
| <b>3*</b>  | 4447477       | 7212606       | 6012292       | 6333238             |
| Total AREA | 7294407       | 8819558       | 7415502       | 6499904             |

|                     | <b>% Total Area</b> |           |           |
|---------------------|---------------------|-----------|-----------|
|                     | <b>21*</b>          | <b>4*</b> | <b>3*</b> |
| <b>EryMod6TE</b>    | 35.4                | 11.2      | 53.4      |
| <b>ΔKS</b>          | 19.8                | 19.2      | 61.0      |
| <b>ΔAT</b>          | 29.8                | 16.8      | 53.4      |
| <b>ΔTE</b>          | 5.2                 | 12.1      | 82.6      |
| <b>ΔKS+AT</b>       | 23.4                | 15.6      | 61.0      |
| <b>ΔKS+TE</b>       | 5.4                 | 12.8      | 81.8      |
| <b>ΔAT+TE</b>       | 5.5                 | 13.4      | 81.1      |
| <b>no EryMod6TE</b> | 3.0                 | 0.0       | 97.4      |
